# Supplementary material for: Elucidating the mechanism behind and investigating the efficacy of Traditional Chinese Medicine and Traditional Tibetan Medicine in combination with standard therapeutics in hepatocellular carcinoma and cholangiocarcinoma in vitro
Source: PubMed Central journal article supplement (PMC9511410; doi:10.3389/fphar.2022.906468), 2022-09-12
Supplement: Image1.pdf [file Image1.pdf]

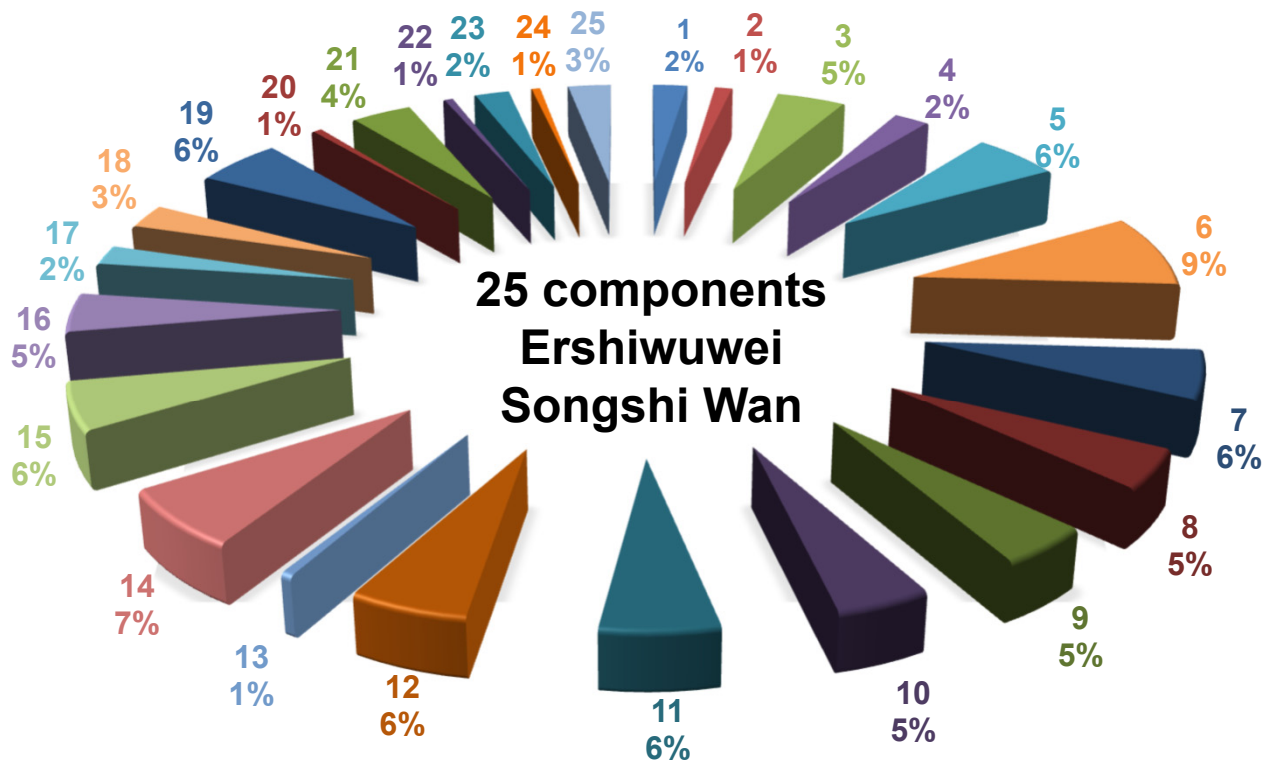

| No | Ingredient                                                                                                                                            | No | Ingredient                                                                                                                                                                                  |
|----|-------------------------------------------------------------------------------------------------------------------------------------------------------|----|---------------------------------------------------------------------------------------------------------------------------------------------------------------------------------------------|
| 1  | Turquoise (mineral)                                                                                                                                   | 16 | Ranunculaceae: <i>Aconitum naviculare</i> (Brühl) Stapf                                                |
| 2  | Pearl                                                                                                                                                 | 17 | Myristicaceae: <i>Myristica fragrans</i> Gronov                                                        |
| 3  | Corals                                                                                                                                                | 18 | Myrtaceae: <i>Syzygium aromaticum</i> (L.) Merr. & L. M. Perry                                         |
| 4  | Asparagaceae: <i>Dracaena cinnabari</i> Balf. f.                                                                                                      | 19 | Saxifragaceae: <i>Saxifraga umbellulata</i> var. <i>pectinata</i> (C. Marquand & Airy Shaw) J. T. Pan  |
| 5  | Combretaceae: <i>Terminalia chebula</i> Retz.                      | 20 | Combretaceae: <i>Terminalia bellirica</i> (Gaertn.) Roxb.                                              |
| 6  | Combretaceae: Scrap iron of <i>Terminalia chebula</i> Retz.        | 21 | Poaceae: <i>Bambusa testilis</i> McClure                                                                                                                                                    |
| 7  | Phyllanthaceae: <i>Phyllanthus emblica</i> L.                      | 22 | Iridaceae: <i>Crocus sativus</i> L.                                                                    |
| 8  | Sciuridae: <i>Trogopterus xanthipes</i> (Minlne Eduards)                                                                                              | 23 | Malvaceae: <i>Bombax ceiba</i> L.                                                                      |
| 9  | Santalaceae: <i>Santalum album</i> L.                              | 24 | Moschidae: <i>Moschus</i> Flerov                                                                                                                                                            |
| 10 | Fabaceae: <i>Dalbergia odorifera</i> T. C. Chen                    | 25 | Travertine (limestone)                                                                                                                                                                      |
| 11 | Aristolochiaceae: <i>Aristolochia debilis</i> Siebold & Zucc.      |    |                                                                                                                                                                                             |
| 12 | Acanthaceae: <i>Justicia adhatoda</i> L.                           |    |                                                                                                                                                                                             |
| 13 | Bovidae: <i>Bos taurus domesticus</i> Gmelin                                                                                                          |    |                                                                                                                                                                                             |
| 14 | Asteraceae: <i>Dolomiaea costus</i> (Falc.) Kasana & A. K. Pandey  |    |                                                                                                                                                                                             |
| 15 | Papaveraceae: <i>Meconopsis cambrica</i> Vig.                      |    |                                                                                                                                                                                             |

Plant-origin 

**Supplementary Figure 1**

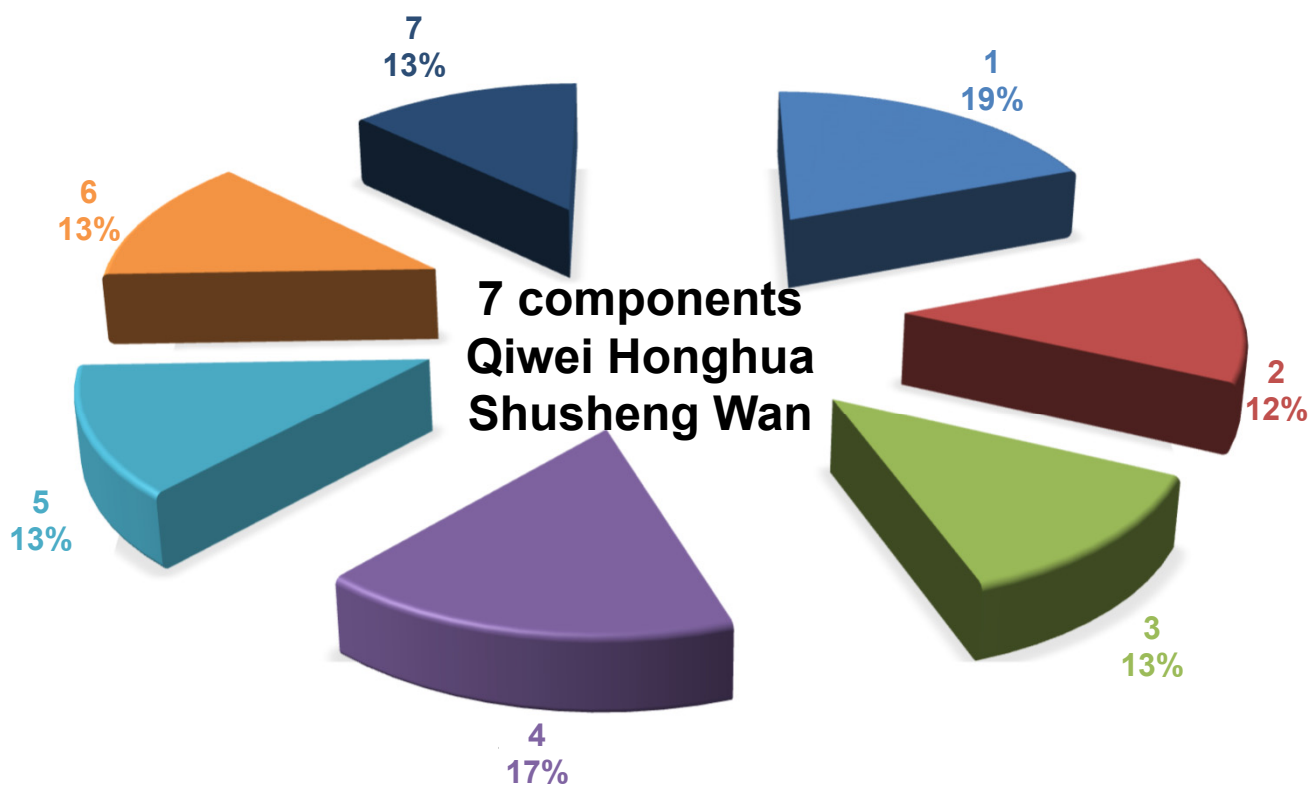

| No | Ingredient                                                                                                                                                                         |
|----|------------------------------------------------------------------------------------------------------------------------------------------------------------------------------------|
| 1  | Asteraceae: <i>Carthamus tinctorius</i> L.                                                    |
| 2  | Poaceae: <i>Bambusa testilis</i> McClure                                                                                                                                           |
| 3  | Gentianaceae: <i>Swertia bimaculata</i> (Siebold & Zucc.) Hook. f. & Thomson ex C. B. Clarke  |
| 4  | Combretaceae: <i>Terminalia chebula</i> Retz.                                                                                                                                      |
| 5  | Ephedraceae: <i>Ephedra sinica</i> Stapf                                                      |
| 6  | Aristolochiaceae: <i>Aristolochia debilis</i> Siebold & Zucc.                                 |
| 7  | Papaveraceae: <i>Meconopsis cambrica</i> Vig.                                                 |

Plant-origin 

## Supplementary Figure 2

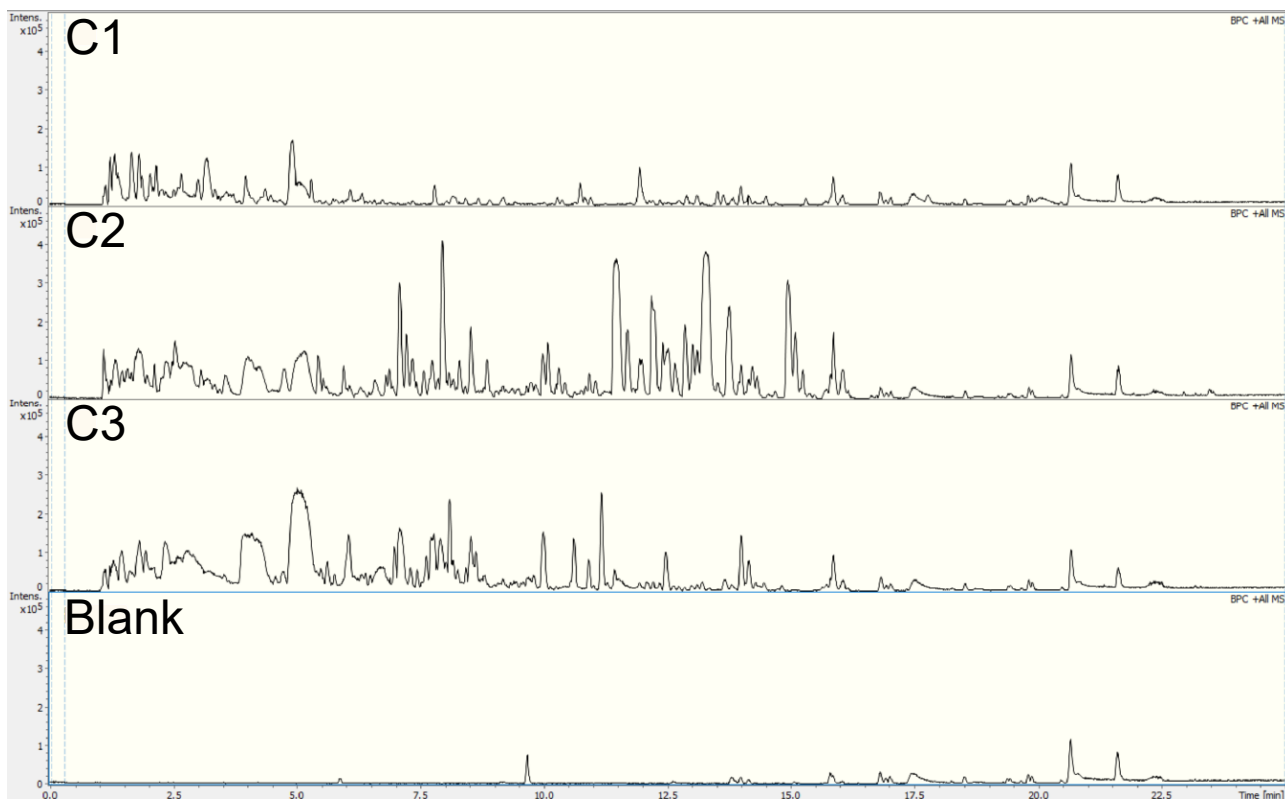

**Supplementary Figure 3**

**(A)**

**HCC C1 24 h**

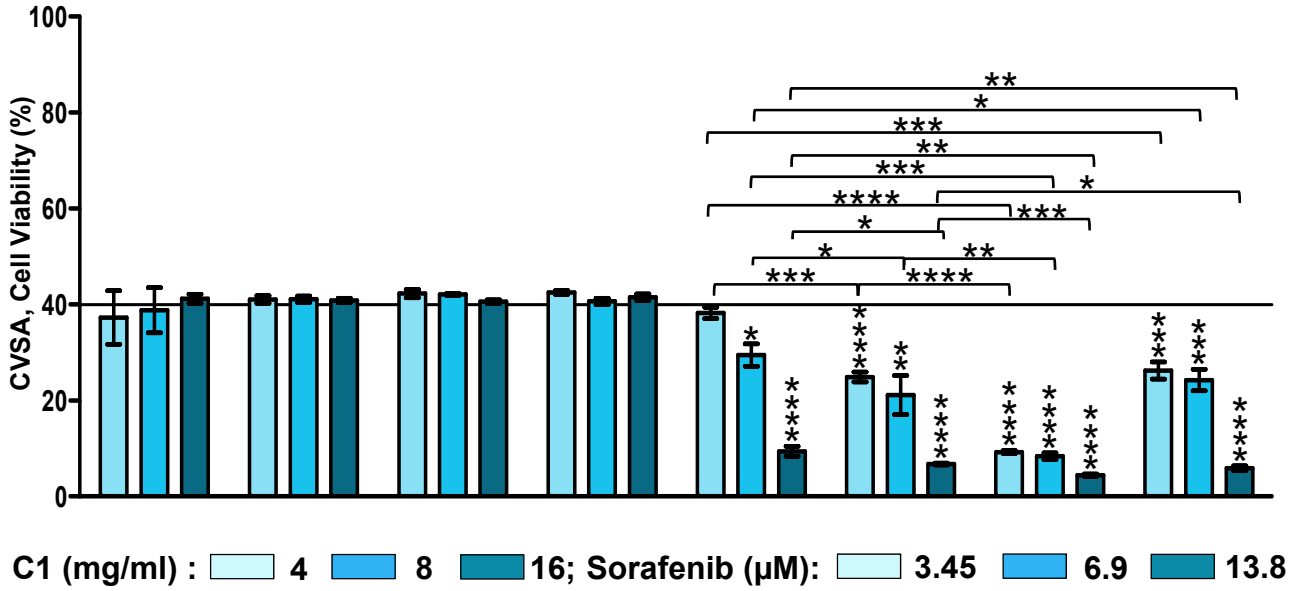

**(B)**

**HCC C1 48 h**

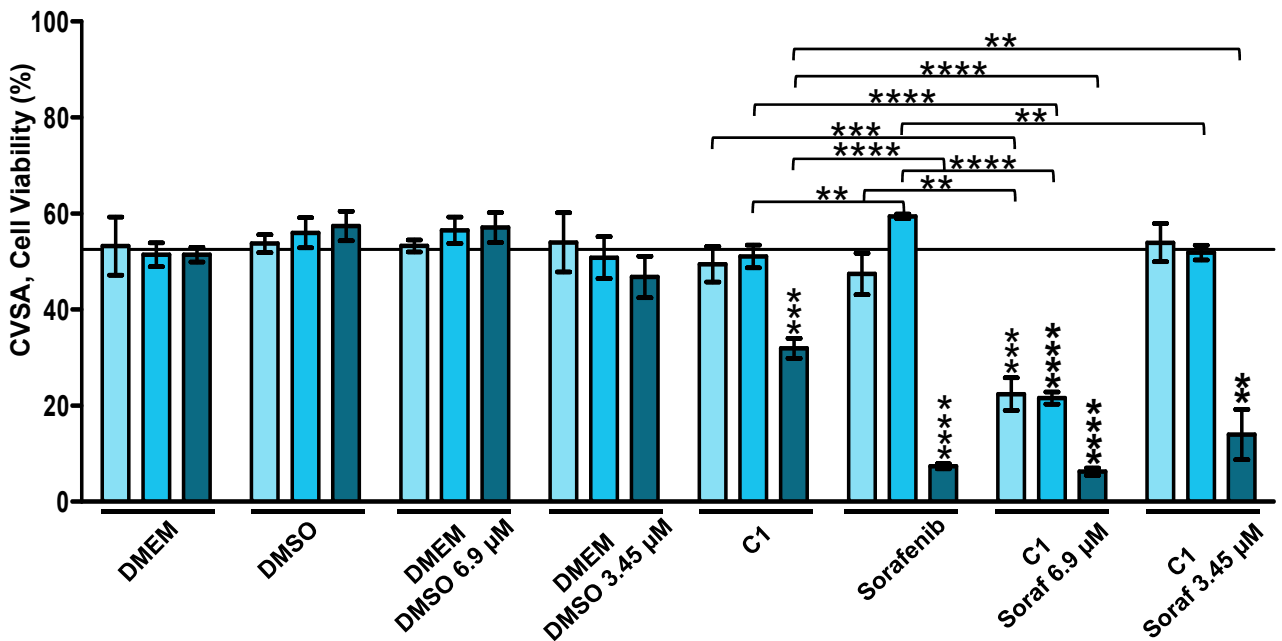

**Supplementary Figure 4**

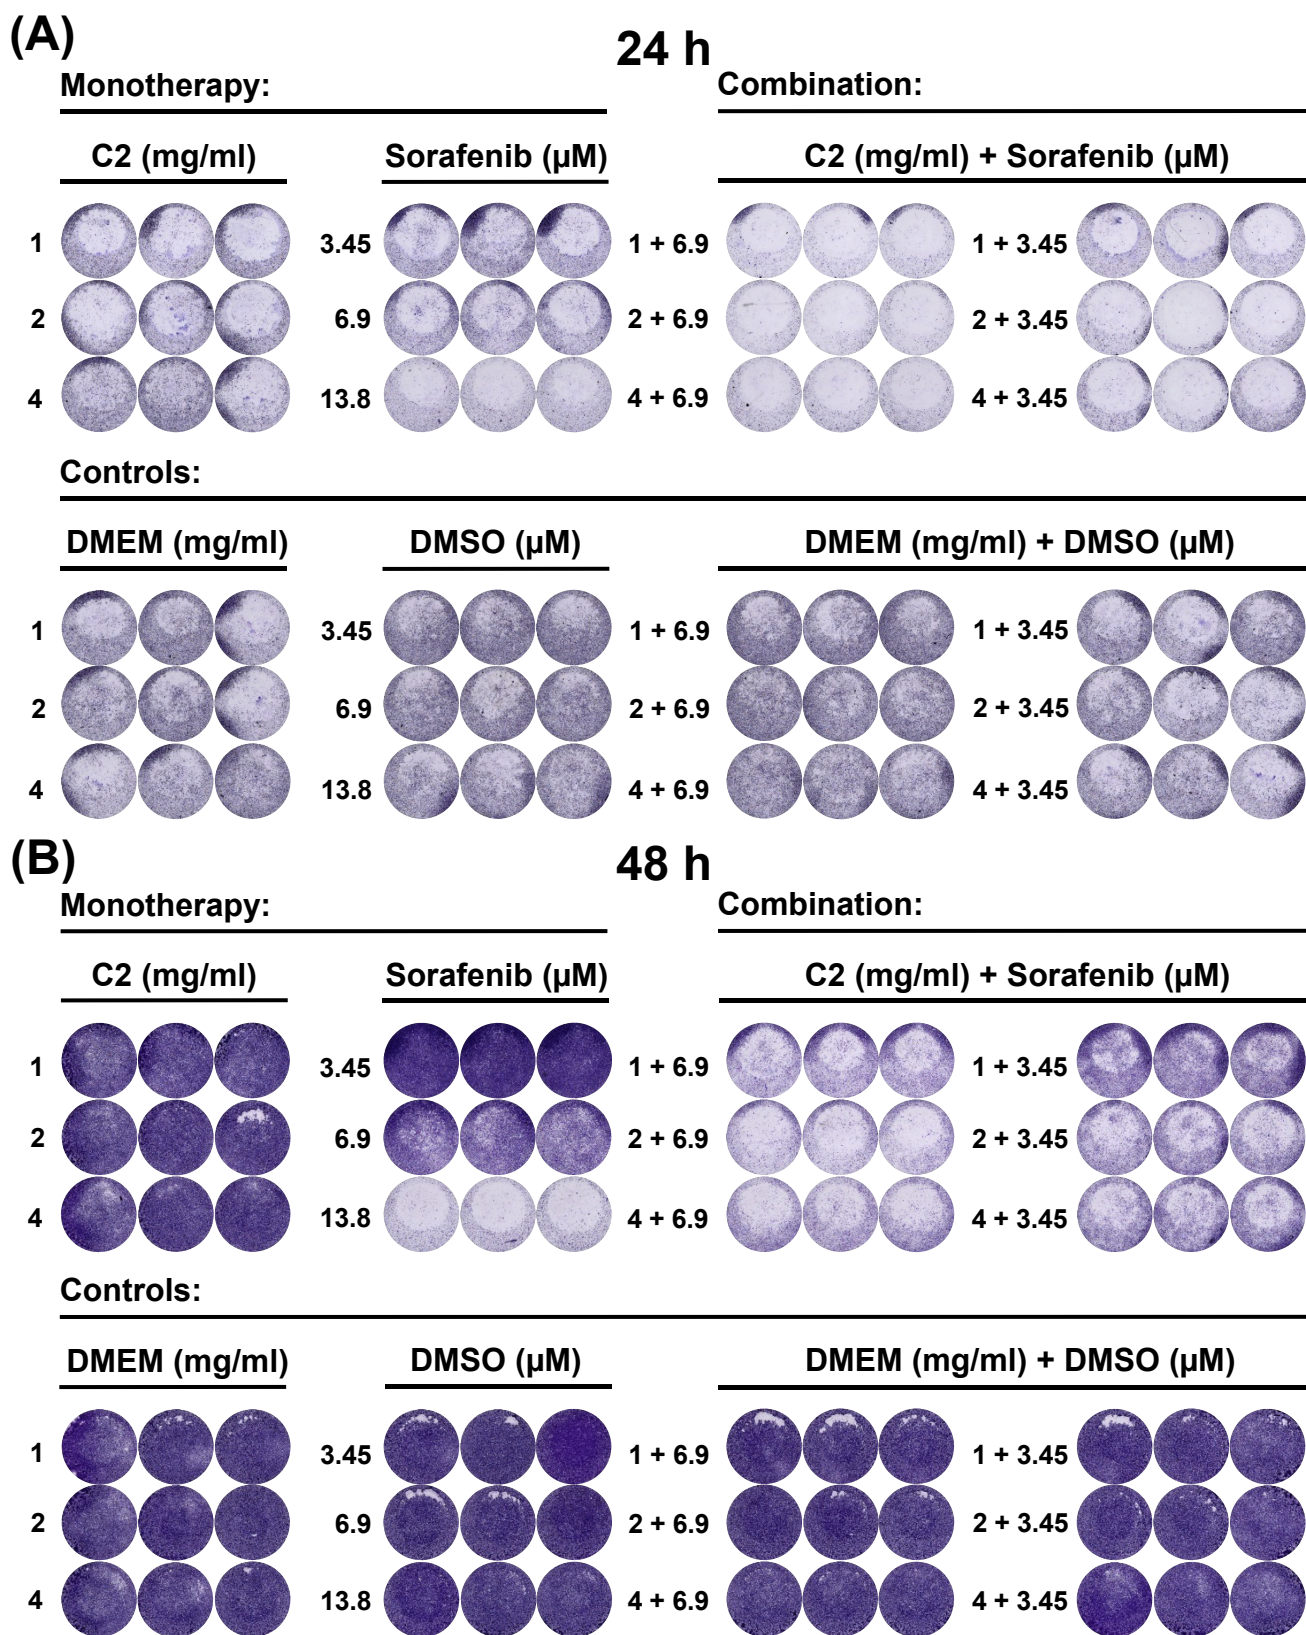

**Supplementary Figure 5**

**(A)**

### HCC C2 24 h

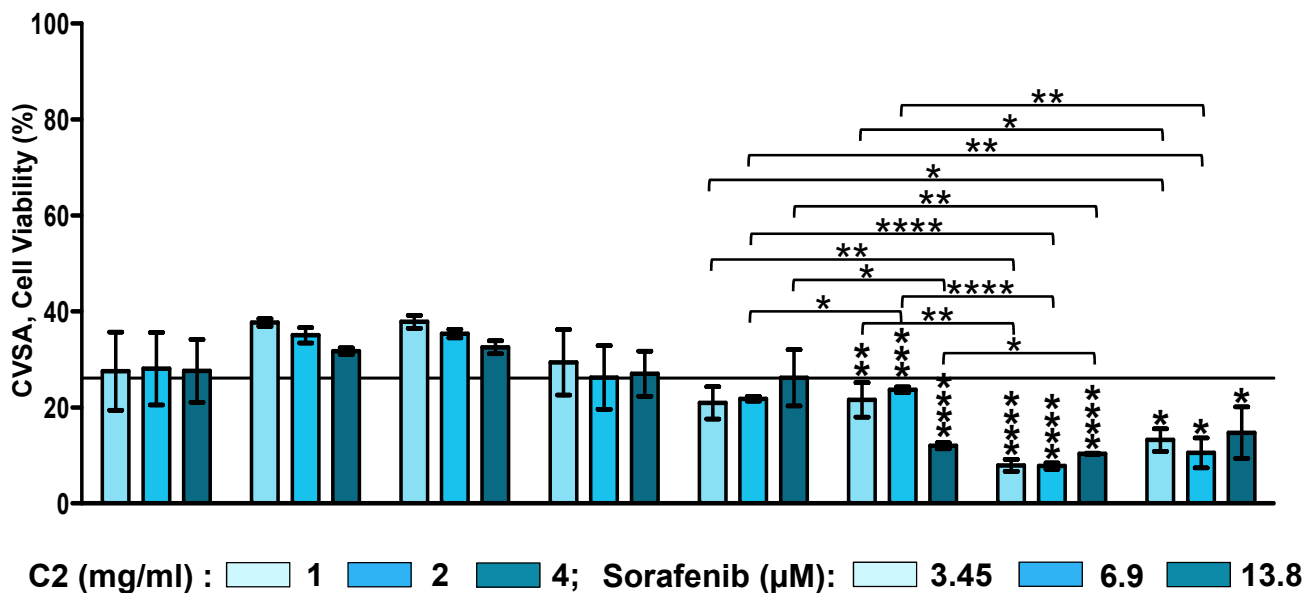

**(B)**

### HCC C2 48 h

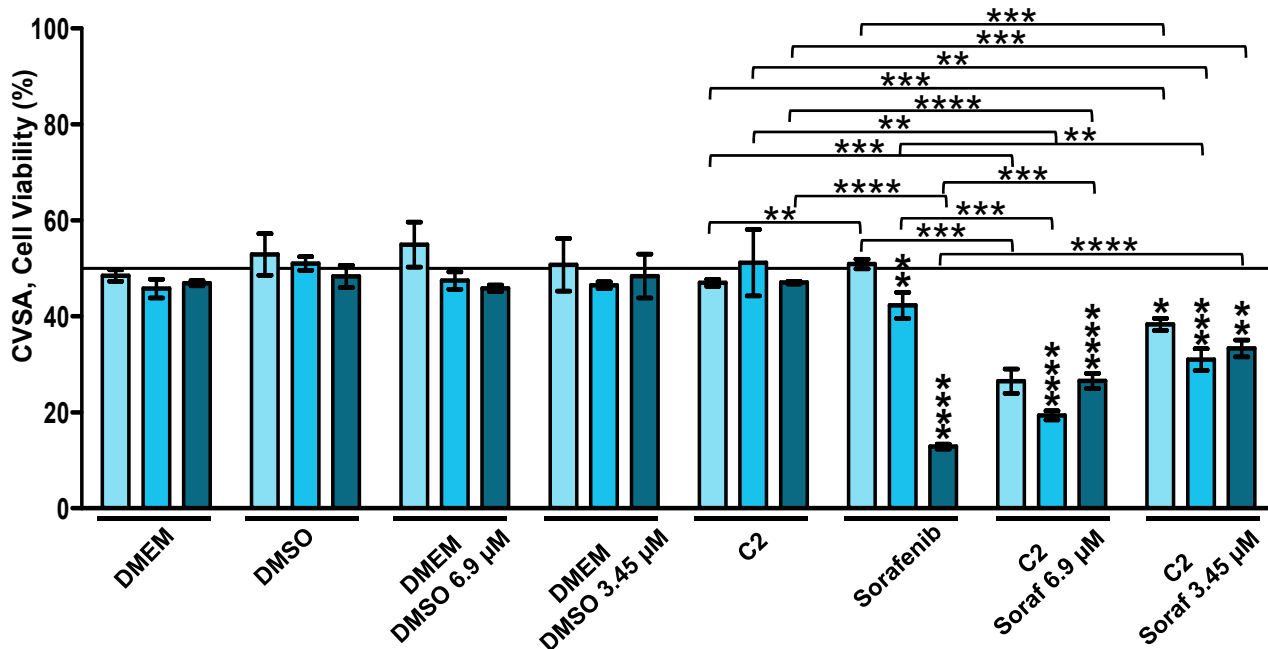

**Supplementary Figure 6**

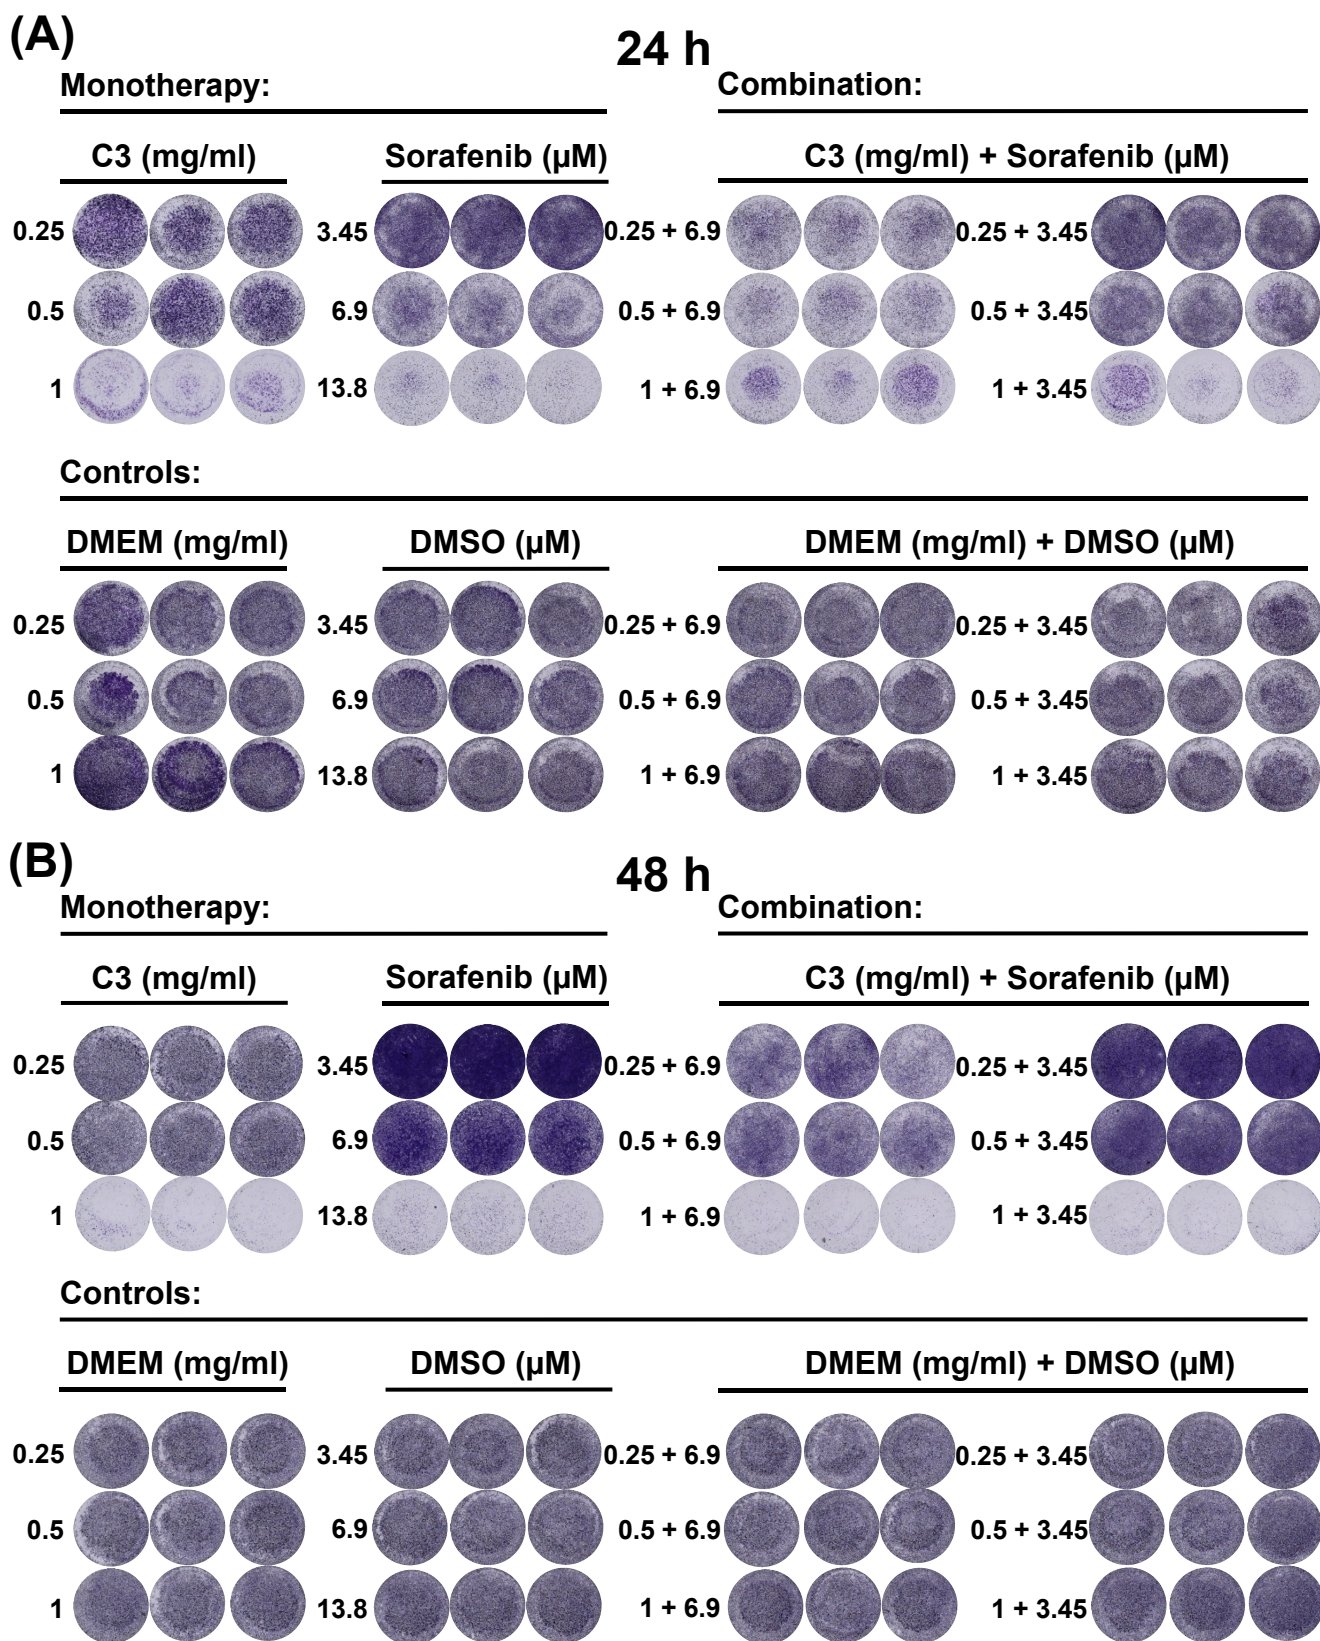

**Supplementary Figure 7**

(A)

### HCC C3 24 h

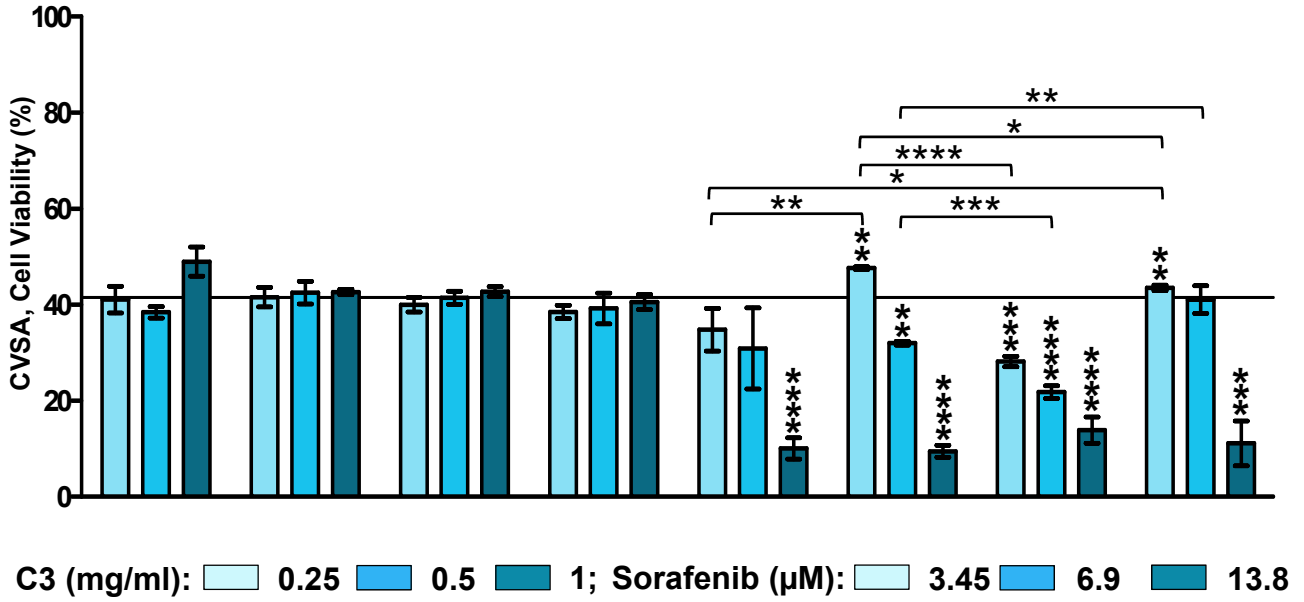

(B)

### HCC C3 48 h

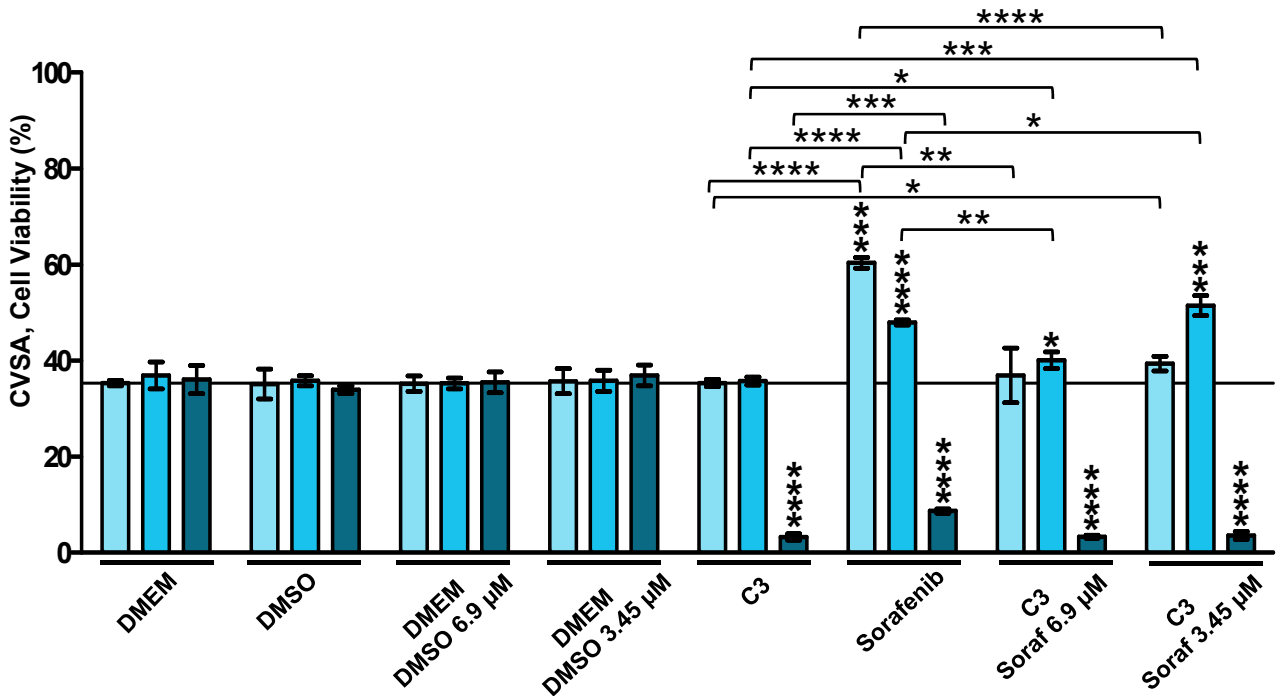

Supplementary Figure 8



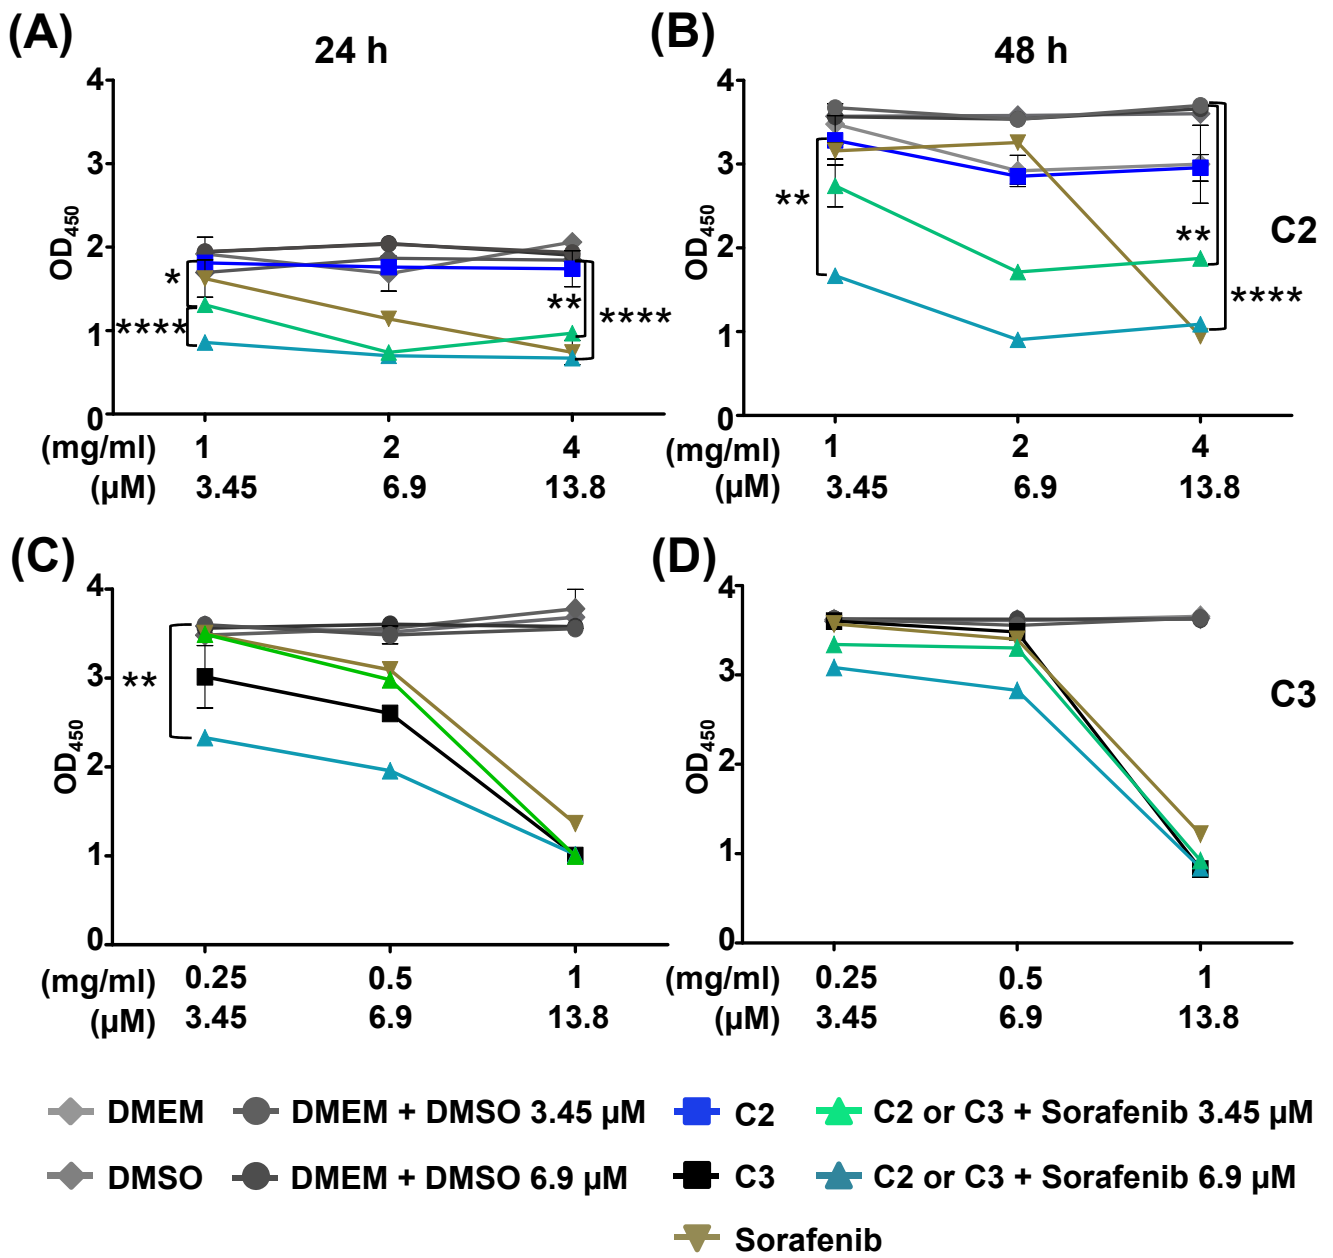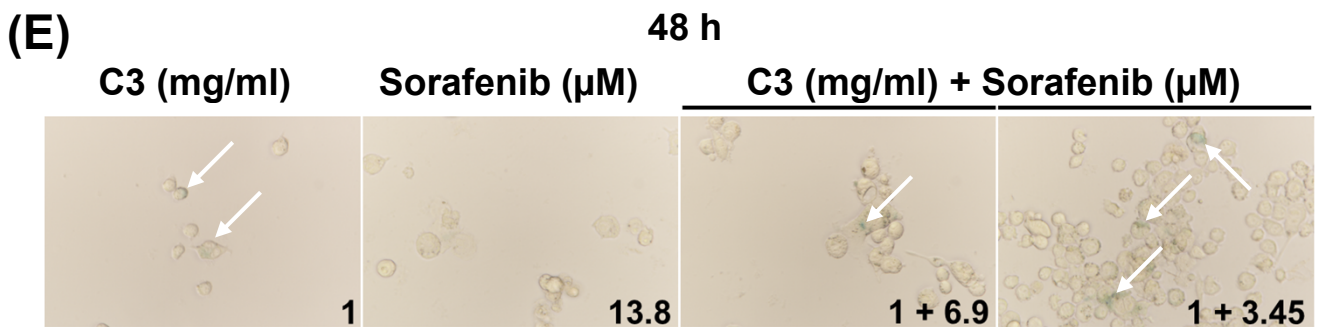

**Supplementary Figure 9**

**(A)**

**C2 / 48 h**

C2 (mg/ml) : 1 2 4; Sorafenib (μM): 3.45 6.9 13.8

**Early apoptosis**

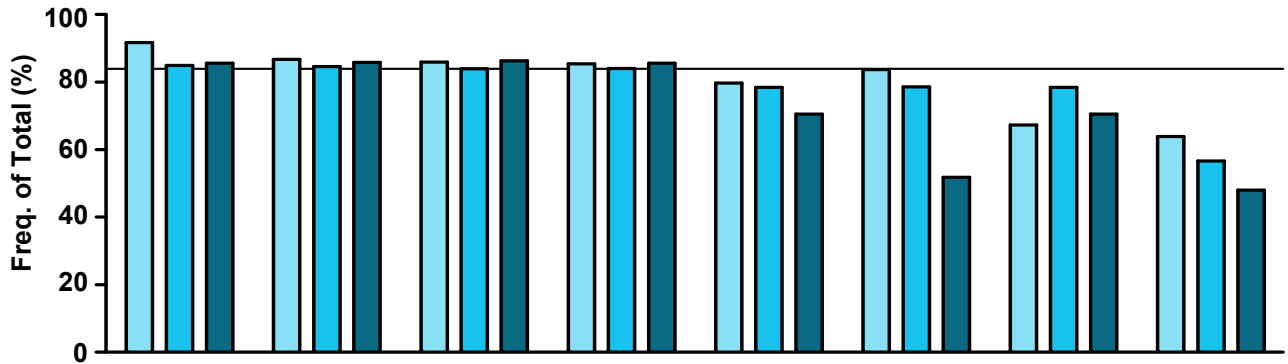

**(B)**

**Late apoptosis**

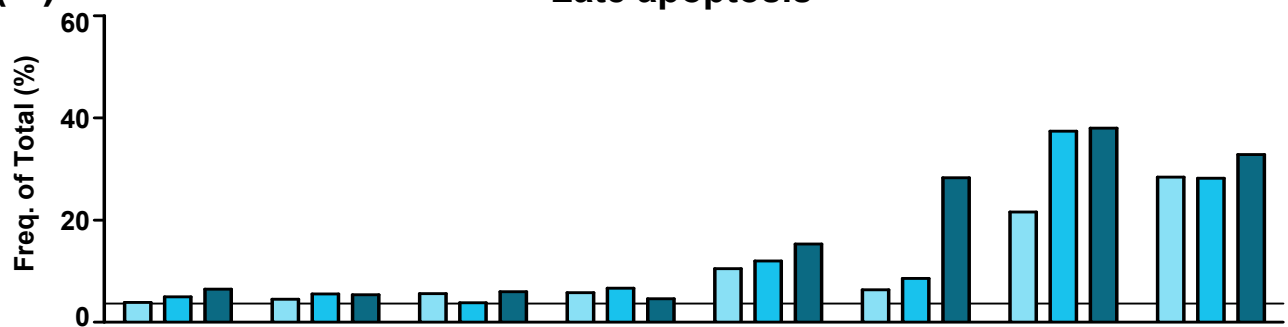

**(C)**

**Necroptosis**

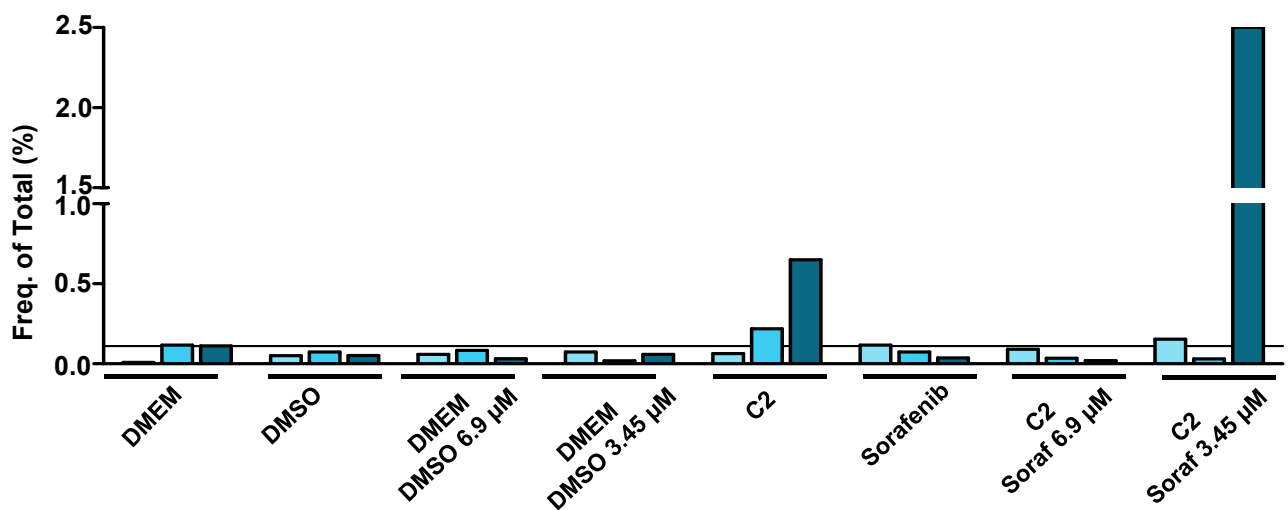

**Supplementary Figure 10**

**(A)**

**C3 / 48 h**

C3 (mg/ml): 0.25 0.5 1; Sorafenib ( $\mu$ M): 3.45 6.9 13.8

**Early apoptosis**

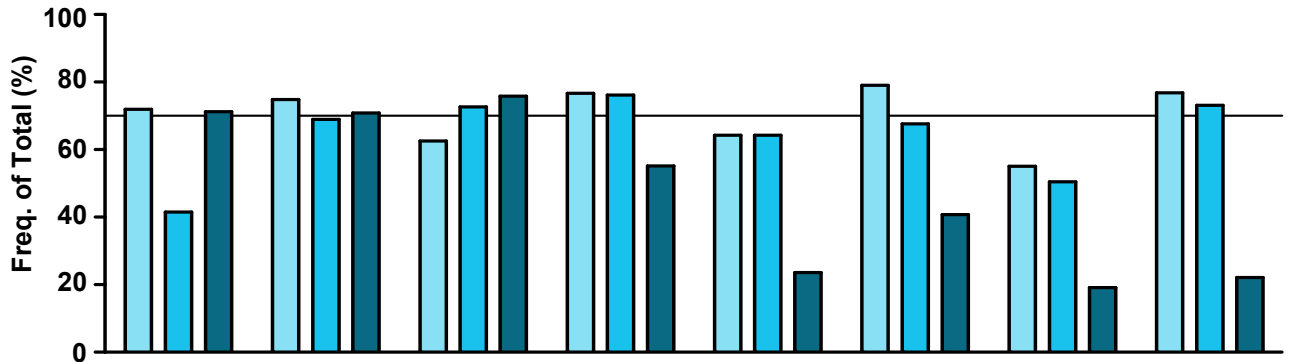

**(B)**

**Late apoptosis**

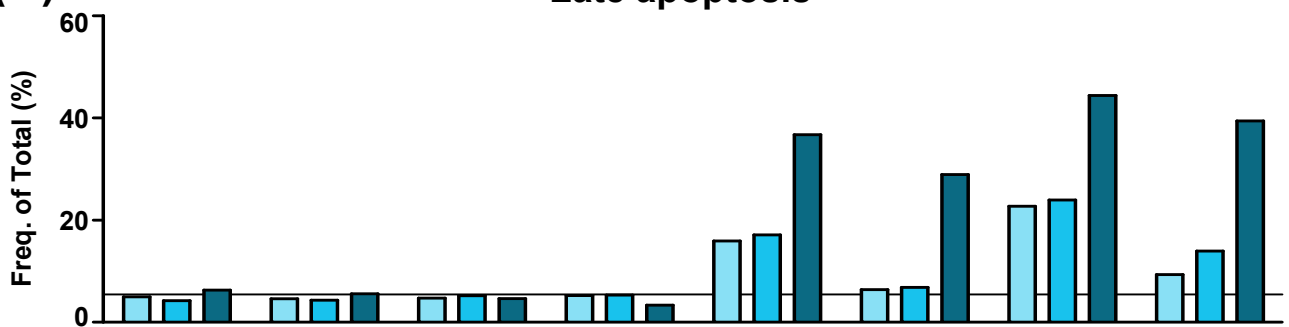

**(C)**

**Necroptosis**

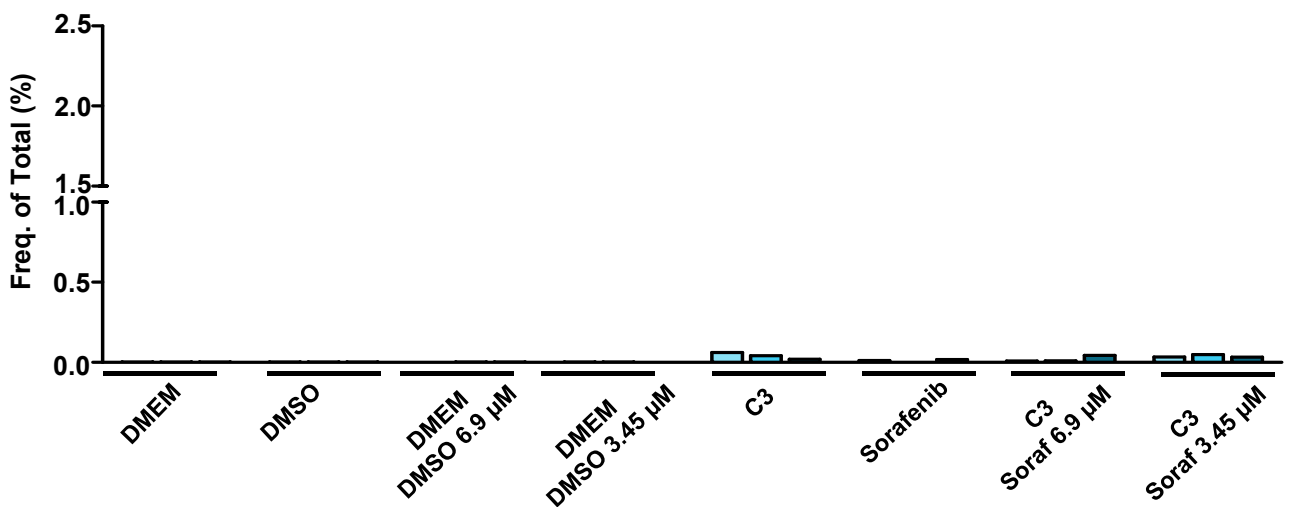

**Supplementary Figure 11**

24 h

Monotherapy:

Combination:

C1 (mg/ml)

C1 (mg/ml) + Gemcitabine ( $\mu$ M)

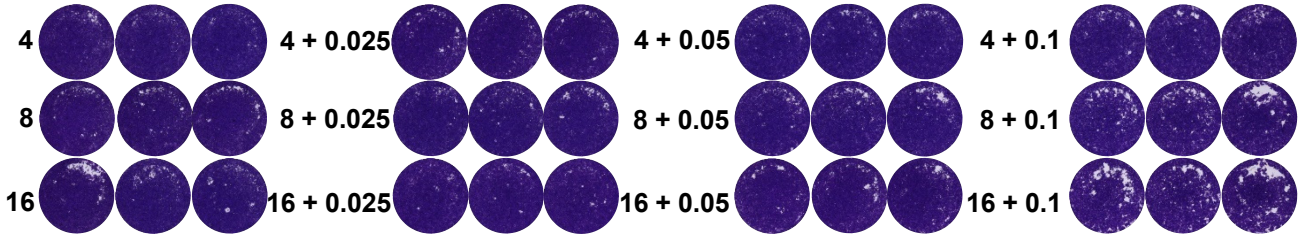

Monotherapy:

Control:

Gemcitabine ( $\mu$ M)

NaCl ( $\mu$ M)

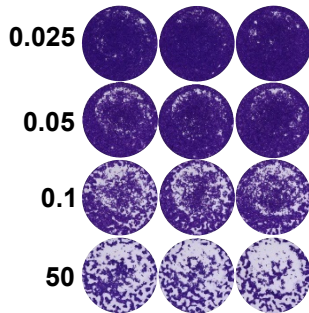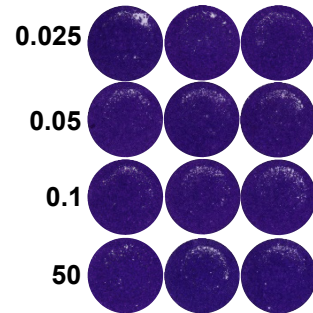

Controls:

DMEM (mg/ml)

DMEM (mg/ml) + NaCl ( $\mu$ M)

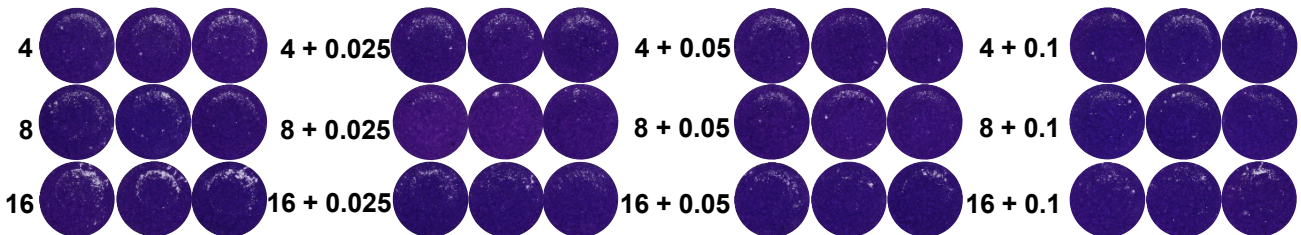

Supplementary Figure 12

# 48 h

## Monotherapy:

## Combination:

### C1 (mg/ml)

### C1 (mg/ml) + Gemcitabine ( $\mu$ M)

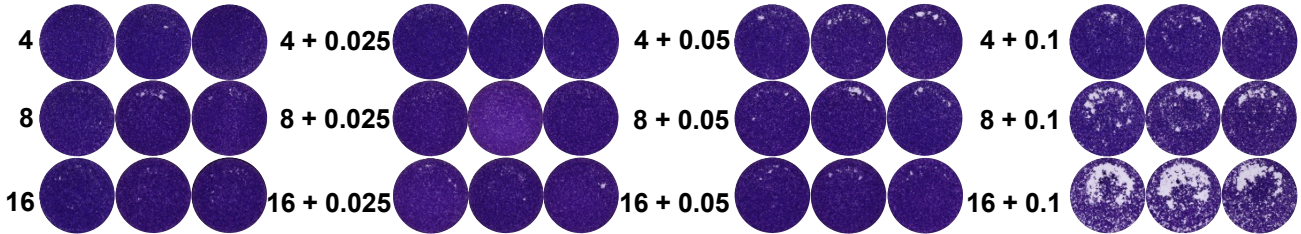

## Monotherapy:

## Control:

### Gemcitabine ( $\mu$ M)

### NaCl ( $\mu$ M)

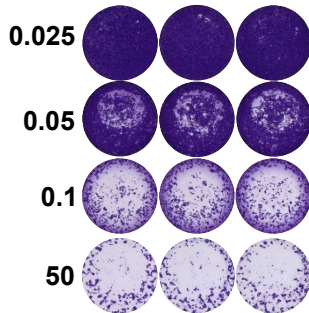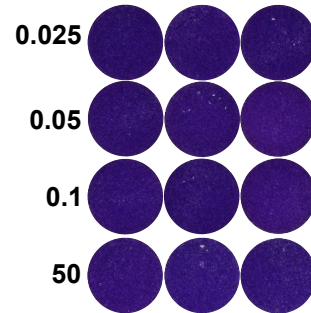

## Controls:

### DMEM (mg/ml)

### DMEM (mg/ml) + NaCl ( $\mu$ M)

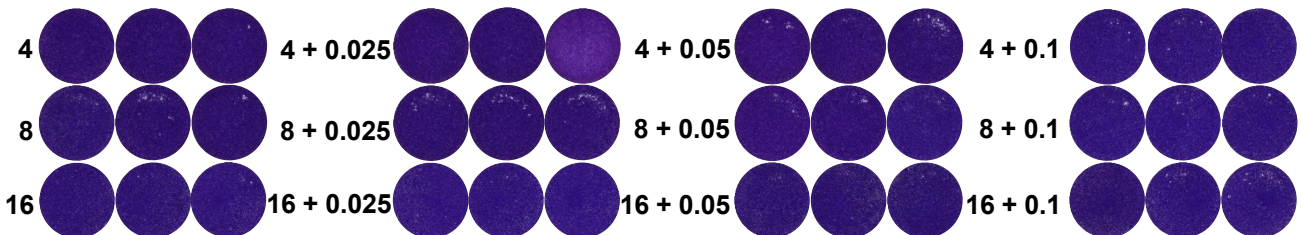

Supplementary Figure 13

(A)

### CCA C1 24 h

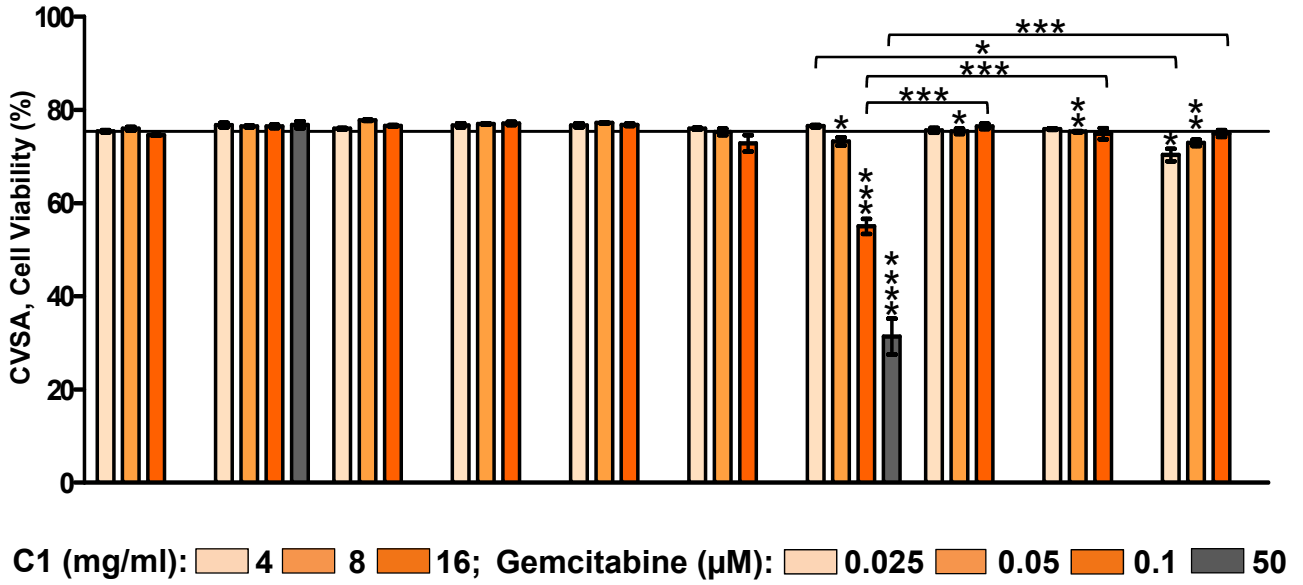

(B)

### CCA C1 48 h

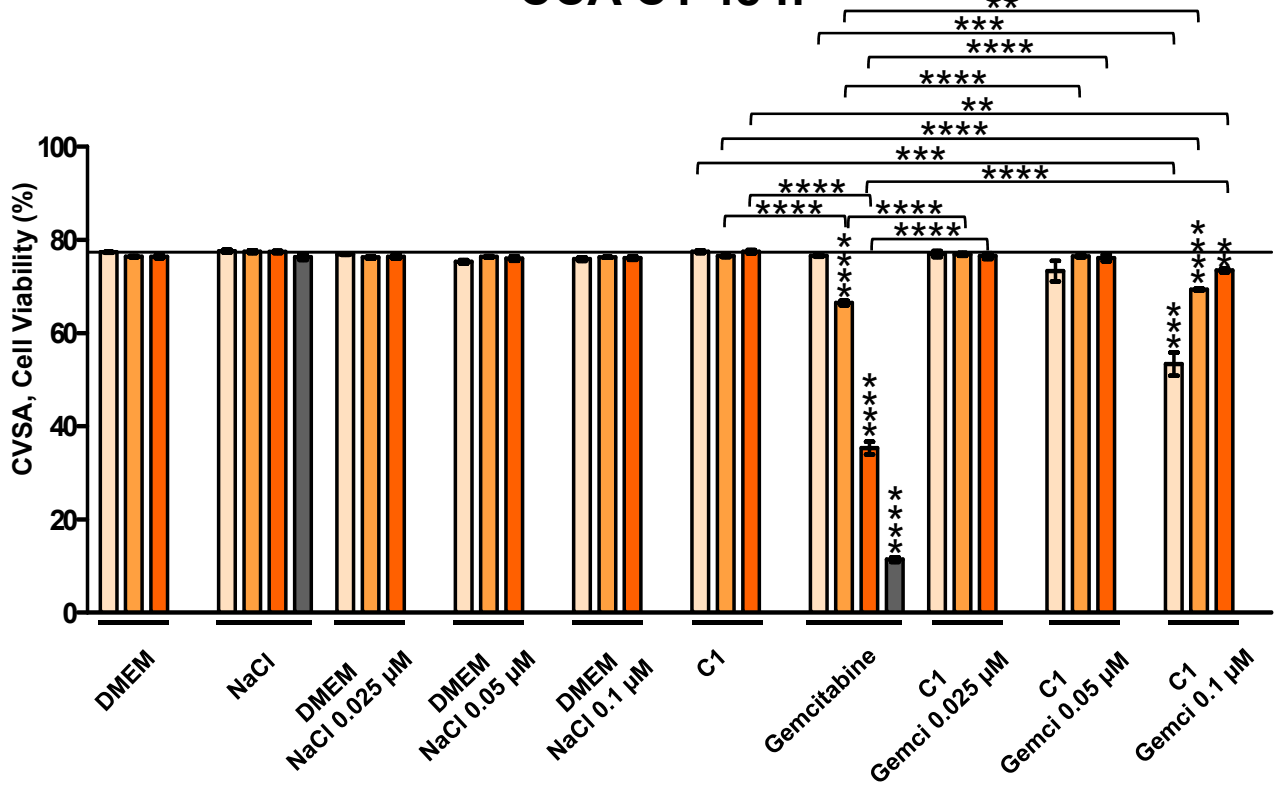

Supplementary Figure 14

(A)

CCA C2 24 h

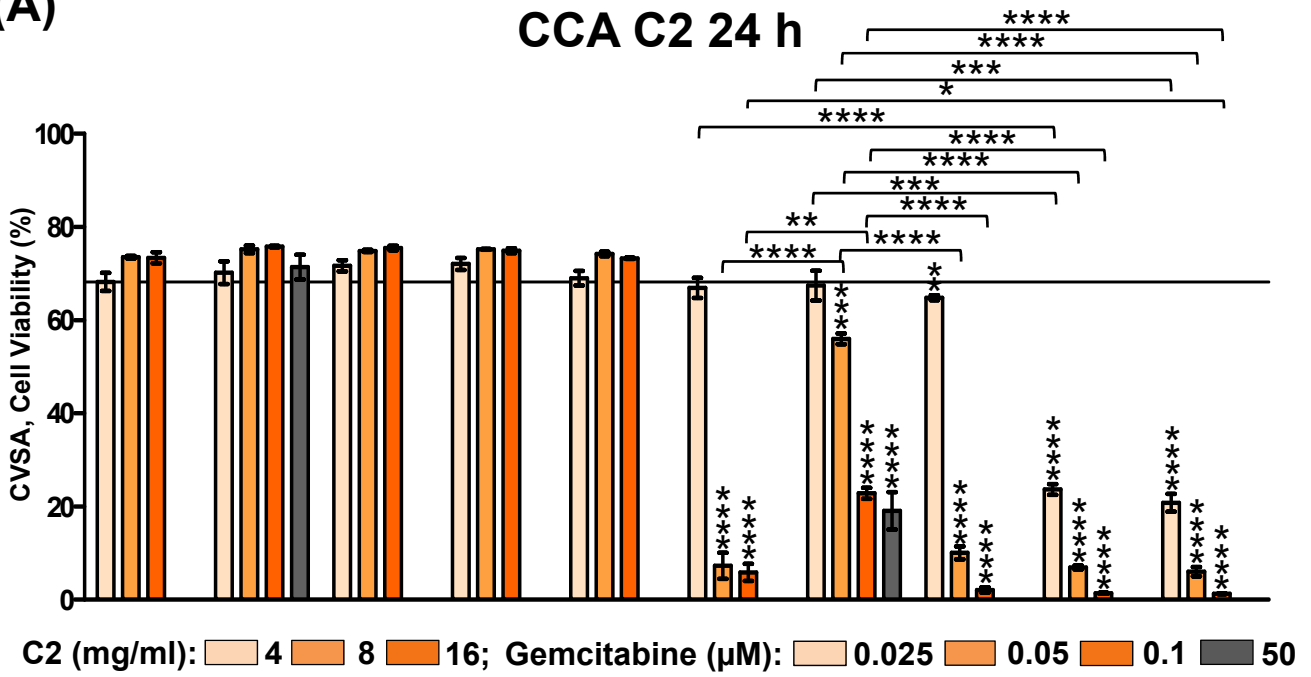

(B)

CCA C2 48 h

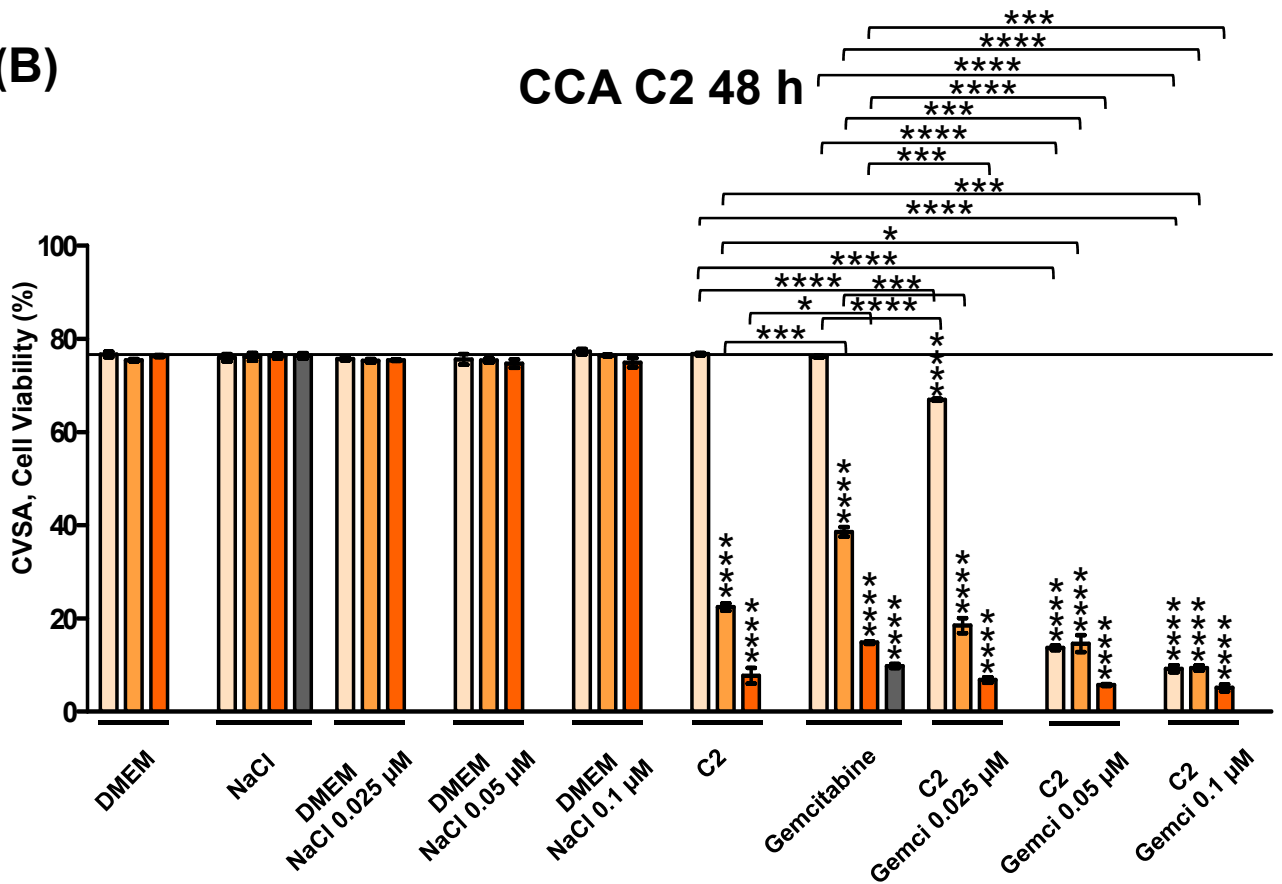

Supplementary Figure 15

(A)

CCA C3 24 h

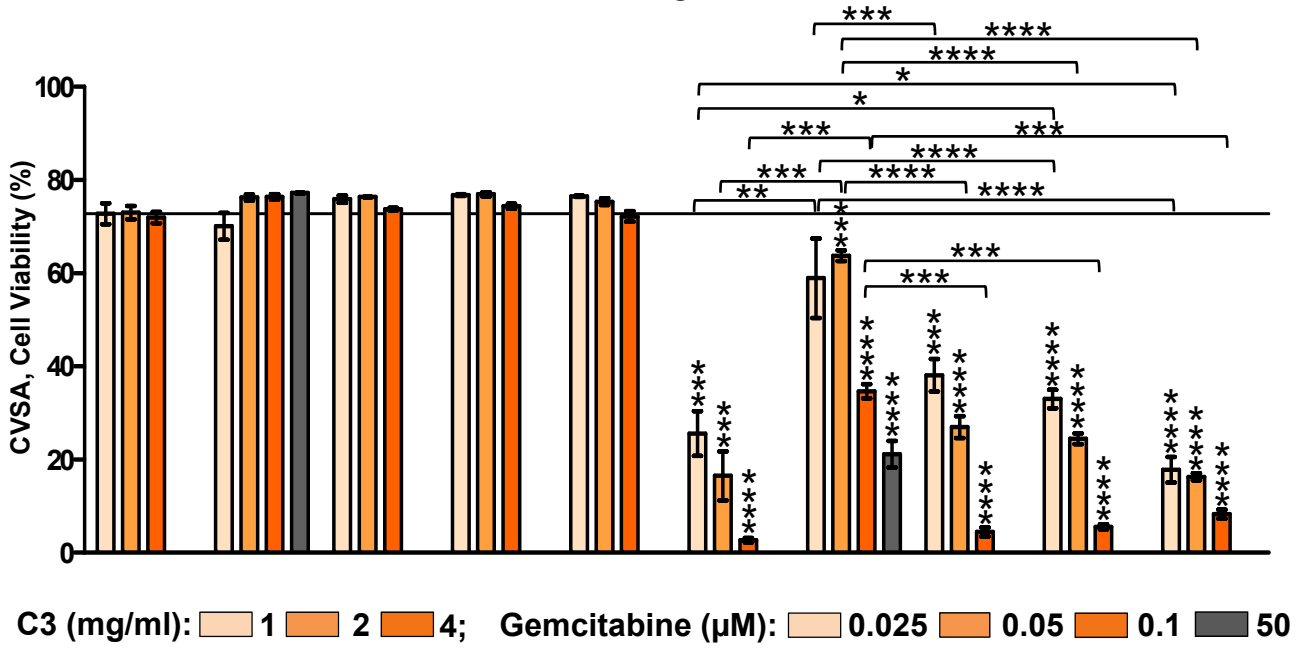

(B)

CCA C3 48 h

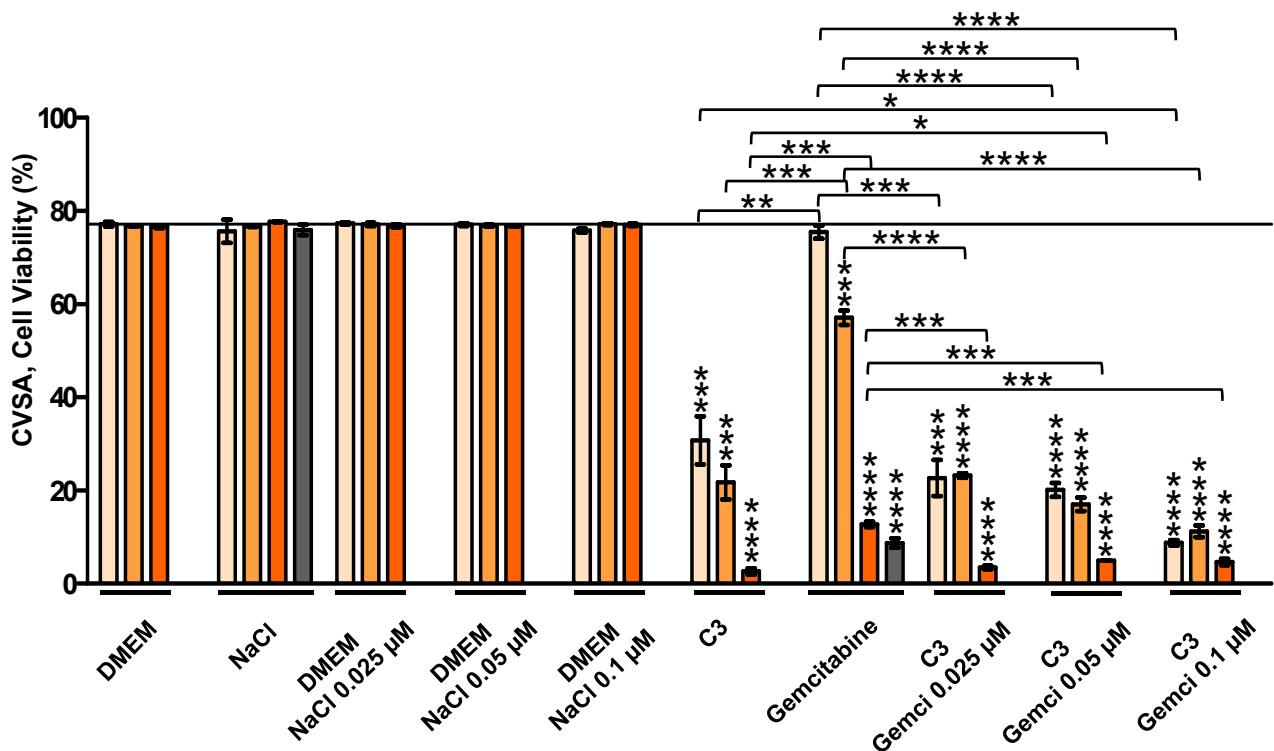

Supplementary Figure 16



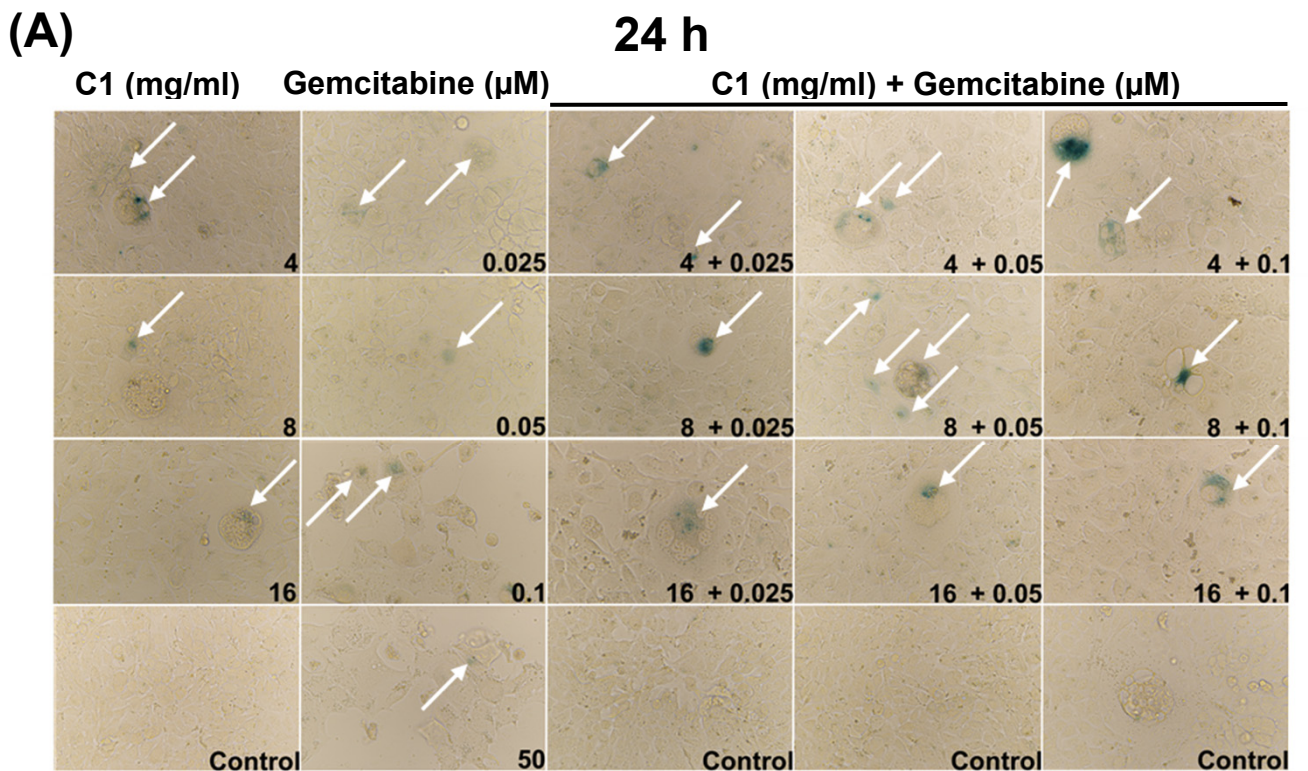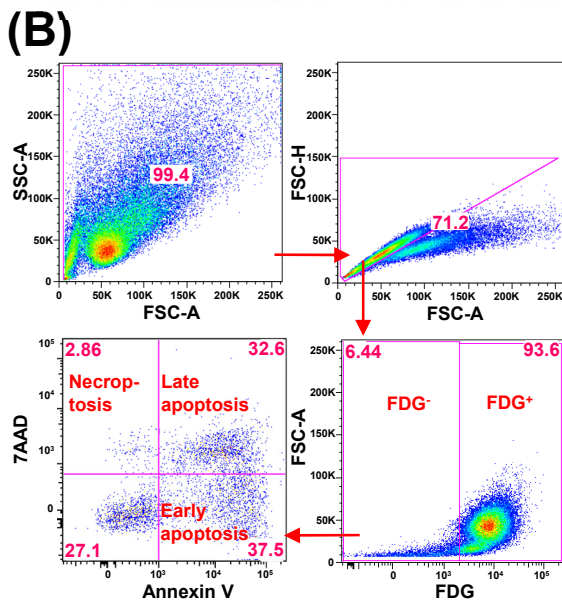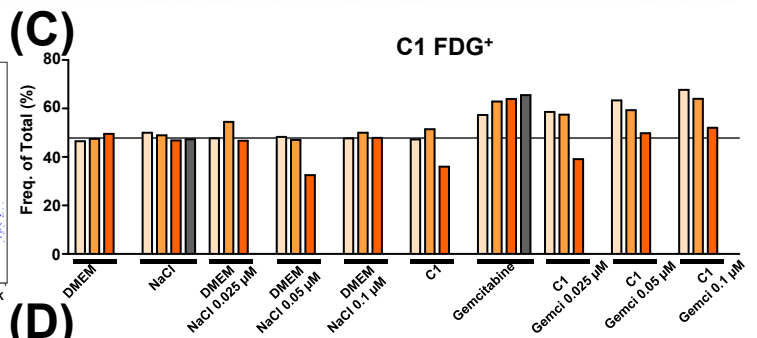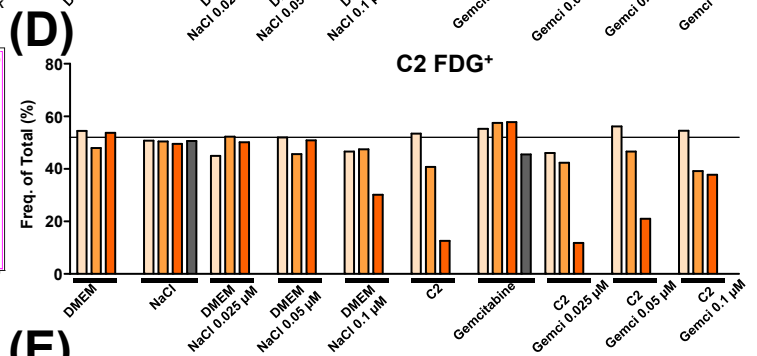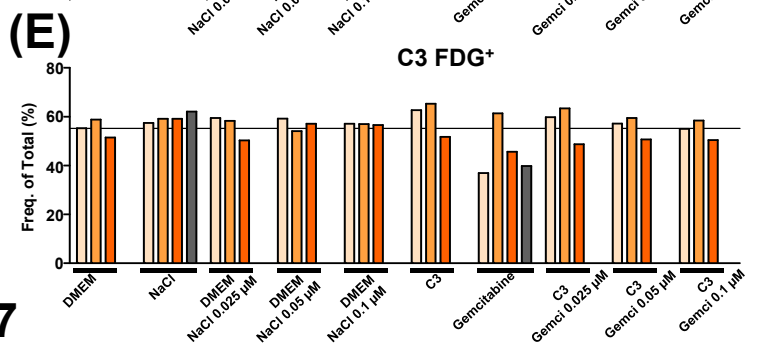

C1 or C2 (mg/ml): 4 8 16  
 C3 (mg/ml): 1 2 4  
 Gemcitabine ( $\mu$ M): 0.025 0.05 0.1 50

**Supplementary Figure 17**

(A)

C1 / 48 h

C1 (mg/ml): 4 8 16; Gemcitabine ( $\mu$ M): 0.025 0.05 0.1 50

Early apoptosis

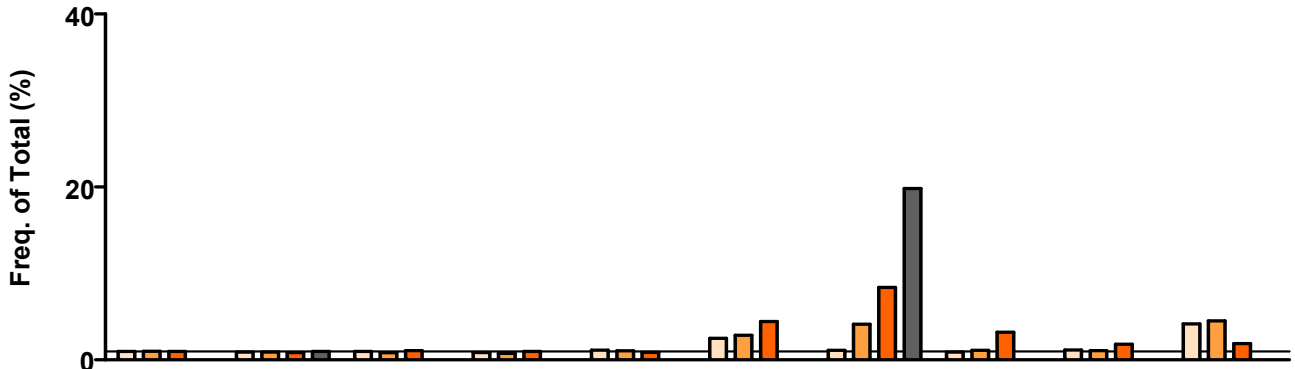

(B)

Late apoptosis

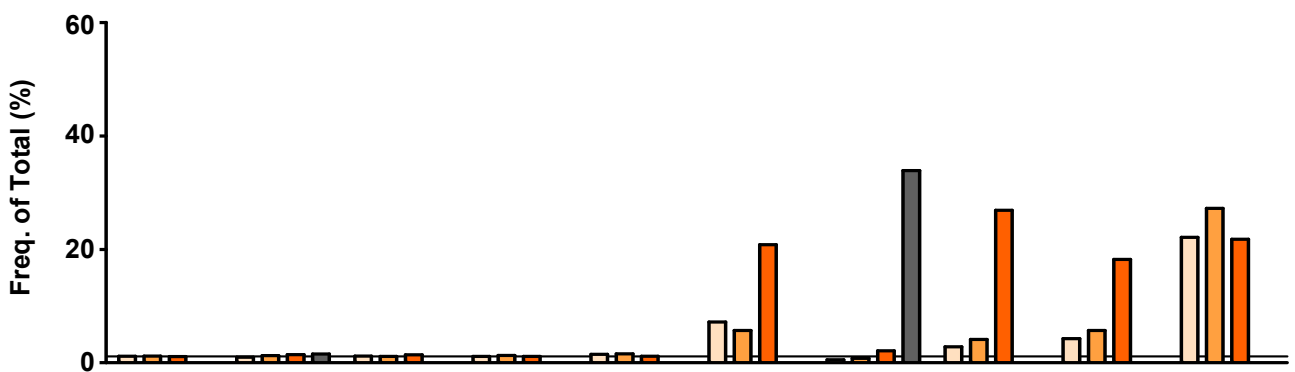

(C)

Necroptosis

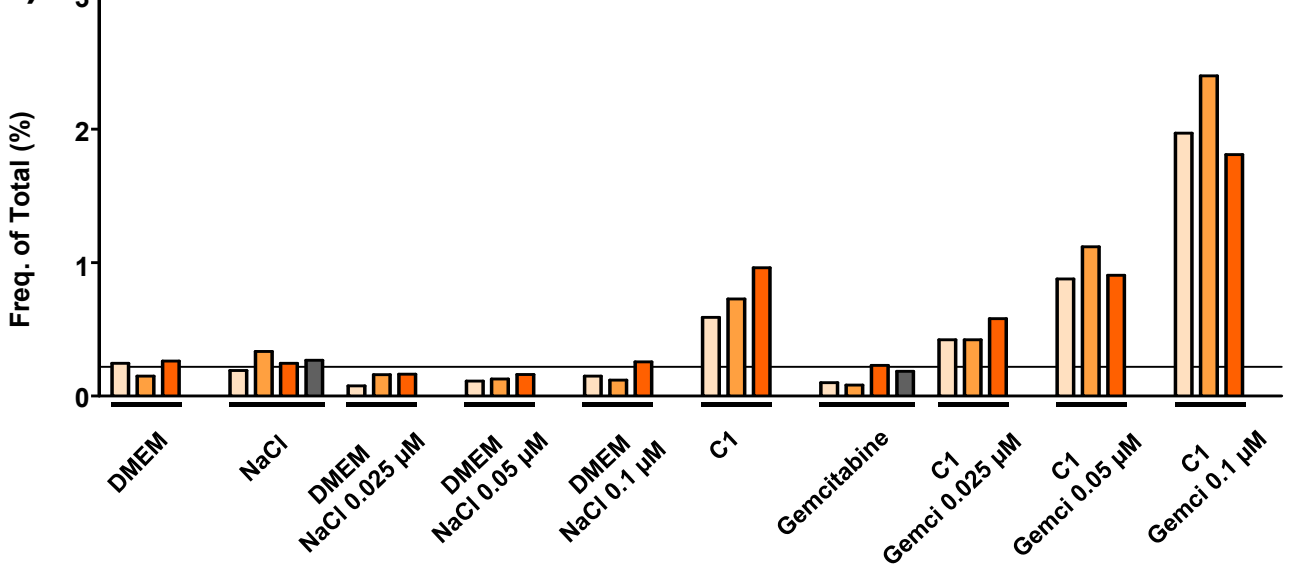

Supplementary Figure 18
